# Supplementary material for: Compensatory Hyperhidrosis Following Endoscopic Thoracic Sympathectomy: A 5-Year Follow-Up Study of Risk Factors and Symptom Progression
Source: Research Square preprint supplement (doi:10.21203/rs.3.rs-5894496/v1), 2025-02-03
Supplement: Supplementary file 1 [file 7a8747ffac352704077032fc.docx]

**Supplementary material：**

**HDSS scale**

| Score | Subjective symptoms |
| --- | --- |
| 1(mild) | Sweating is not obvious without interfering with my daily activities; |
| 2(moderate) | Sweating is tolerable, but sometimes it interferes with my daily activities; |
| 3(severe) | Sweating is reluctantly tolerated and often interferes with my daily activities; |
| 4(extremely severe) | Sweating is intolerable and always interferes with my daily activities; |
